# Supplementary material
Source: ML conference proceedings conference paper supplement (https://aclanthology.org/2026.semeval-1.227)

Subtask C

Subtask A

Input

Query

Data

Summarise  
Conversation &  
Rewrite Query  
(Figure 2)

Retrieve passages

Embedding

Retrieve Context

Data preparation

Data Cleanup

Embedding

Vector databasis

Subtask B

Augment

Reevaluation of  
relevance  
(Figure 3)

Generation

Generate  
answer  
with LLM

Output

Final  
Answer

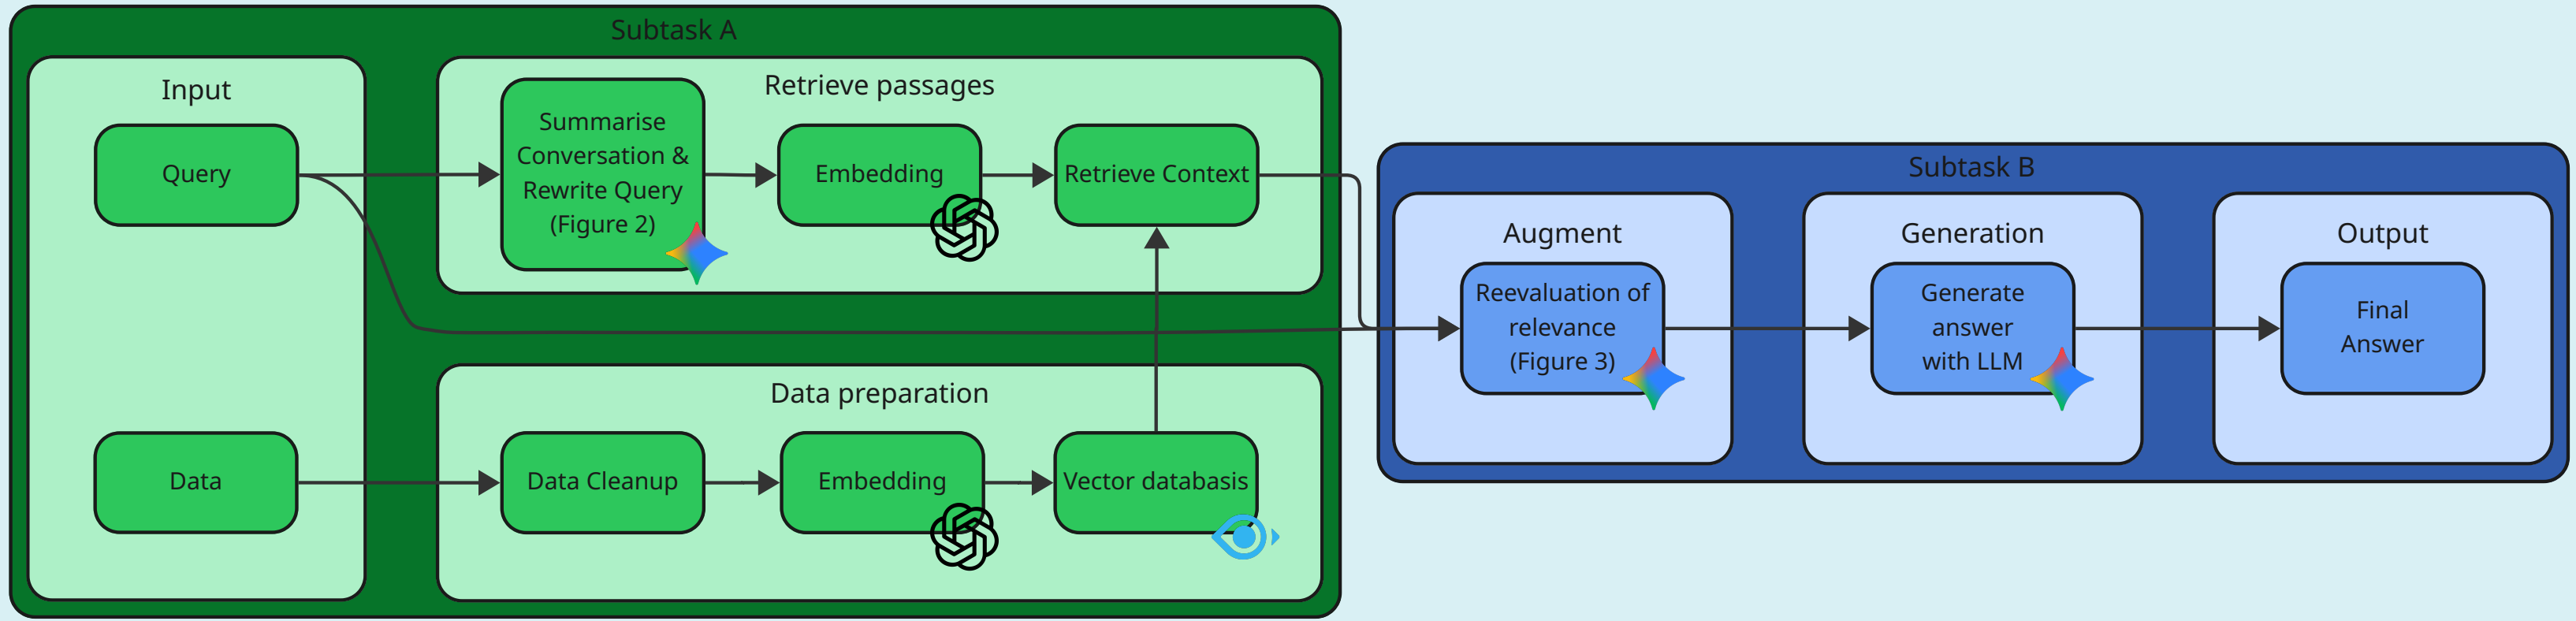

Supplement: SupplementaryMaterial [file Pipeline.pdf › latex/Pipeline.pdf]
